# Supplementary material for: Transcriptomics Reveal the Effects of Breeding Temperature on Growth and Metabolism in the Early Developmental Stage of Platax teira
Source: MDPI journal article supplement (doi:10.3390/biology12091161), 2023-08-23
Supplement: s1 [file s1]

**Supplementary Table S1 Disembarkation data**

| <b>Sample</b> | <b>Raw reads</b> | <b>Raw bases</b> | <b>Error rate (%)</b> | <b>Q20(%)</b> | <b>Q30(%)</b> | <b>GC content (%)</b> |
|---------------|------------------|------------------|-----------------------|---------------|---------------|-----------------------|
| 21°C-1        | 47742756         | 7.21E+09         | 0.026                 | 97.49         | 93.39         | 48.89                 |
| 21°C-2        | 49561682         | 7.48E+09         | 0.0263                | 97.32         | 93.15         | 46.97                 |
| 21°C-3        | 47584150         | 7.19E+09         | 0.0261                | 97.44         | 93.3          | 46.69                 |
| 24°C-1        | 51560346         | 7.79E+09         | 0.0259                | 97.52         | 93.5          | 49.94                 |
| 24°C-2        | 41554762         | 6.27E+09         | 0.0259                | 97.48         | 93.51         | 48.32                 |
| 24°C-3        | 57901326         | 8.74E+09         | 0.0258                | 97.52         | 93.56         | 48.82                 |
| 27°C-1        | 50249480         | 7.59E+09         | 0.0254                | 97.72         | 93.94         | 50.3                  |
| 27°C-2        | 45434242         | 6.86E+09         | 0.026                 | 97.43         | 93.42         | 47.47                 |
| 27°C-3        | 46846462         | 7.07E+09         | 0.026                 | 97.46         | 93.41         | 47.45                 |
| 30°C-1        | 49649280         | 7.50E+09         | 0.0257                | 97.59         | 93.6          | 50.5                  |
| 30°C-2        | 59157916         | 8.93E+09         | 0.0259                | 97.45         | 93.47         | 50.34                 |
| 30°C-3        | 57766186         | 8.72E+09         | 0.0256                | 97.6          | 93.74         | 50.17                 |

**Supplementary Table S2 Data filtering statistics**

| <b>Sample</b> | <b>Clean reads</b> | <b>Mapped reads</b> | <b>Mapped ratio</b> |
|---------------|--------------------|---------------------|---------------------|
| 21°C-1        | 23682465           | 17891764            | 75.55%              |
| 21°C-2        | 24541157           | 17927444            | 73.05%              |
| 21°C-3        | 23592874           | 17034968            | 72.20%              |
| 24°C-1        | 25562748           | 19796853            | 77.44%              |
| 24°C-2        | 20576389           | 15797221            | 76.77%              |
| 24°C-3        | 28669801           | 22291945            | 77.75%              |
| 27°C-1        | 24937614           | 19177963            | 76.90%              |
| 27°C-2        | 22472441           | 16995080            | 75.63%              |
| 27°C-3        | 23195794           | 17425182            | 75.12%              |
| 30°C-1        | 24624303           | 19035171            | 77.30%              |
| 30°C-2        | 29293587           | 23244916            | 79.35%              |
| 30°C-3        | 28624550           | 22801491            | 79.66%              |
